# Comparison of Glycemic Variability Associated With Insulin Glargine and Intermediate-Acting Insulin When Used as the Basal Component of Multiple Daily Injections for Adolescents With Type 1 Diabetes

NEIL H. WHITE, MD, CDE<sup>1</sup>  
H. PETER CHASE, MD<sup>2</sup>  
SILVA ARSLANIAN, MD<sup>3</sup>

WILLIAM V. TAMBORLANE, MD<sup>4</sup>  
FOR THE 4030 STUDY GROUP\*

**OBJECTIVE** — To compare the glucose variability associated with insulin glargine and NPH/Lente insulin used as the basal insulin component of a multiple daily injection (MDI) regimen in pediatric patients with type 1 diabetes.

**RESEARCH DESIGN AND METHODS** — Continuous glucose monitoring data were collected from a subset of patients ( $n = 90$ ) who agreed to use a continuous glucose monitoring system during an active-controlled, randomized, open-label study evaluating the safety and efficacy of insulin glargine and NPH/Lente insulin used with insulin lispro as part of an MDI regimen.

**RESULTS** — Treatment with insulin glargine resulted in significant reductions in glucose variability as measured by the SD of glucose values (adjusted mean change from baseline to week 24:  $-13.4$  mg/dl [ $-0.74$  mmol/l];  $P \leq 0.05$ ), mean amplitude of glycemic excursion ( $-34.4$  mg/dl [ $-1.91$  mmol/l];  $P \leq 0.0001$ ), and  $M$  value ( $-9.6$  mg/dl [ $-0.53$  mmol/l];  $P \leq 0.03$ ). The corresponding reductions in glucose variability for NPH/Lente were not significant.

**CONCLUSIONS** — Insulin glargine is associated with greater reductions in glucose variability than NPH/Lente insulin in pediatric patients with type 1 diabetes.

*Diabetes Care* 32:387–393, 2009

Improved glycemic control to prevent or delay microvascular complications is of paramount importance in children and adolescents with type 1 diabetes but is often achieved at the price of increased hypoglycemia (1,2). Persistent wide fluctuations in plasma glucose in the presence of lower mean glucose and A1C values may be an important reason why inten-

sive therapy, as practiced in the Diabetes Control and Complications Trial, increases the risk of severe hypoglycemia (2,3). Several studies have suggested that glycemic variability may also play an independent role in the development of diabetes complications (4–8). Therefore, some investigators suggest that blood glucose variability, when combined with

A1C levels, is an important indicator of glycemic control and the risk for long-term complications (9,10).

Insulin glargine (Lantus; sanofi-aventis U.S., Bridgewater, NJ) is a basal insulin with little or no pronounced action peak and limited site absorption variation (11). Its use as part of a multiple daily injection (MDI) regimen demonstrated good glucose control with less hypoglycemia than NPH insulin in adults with type 1 or type 2 diabetes (12,13). However, only one major randomized clinical trial in pediatric patients has examined the relative efficacy of insulin glargine-based MDI versus MDI regimens utilizing intermediate-acting insulins, and this study did not examine glucose variability (14).

Consequently, we performed a large randomized clinical trial in adolescents with type 1 diabetes to compare these two approaches to intensive insulin therapy. A secondary aim of this trial was to compare the glucose variability using insulin glargine with that using intermediate-acting insulin (NPH or Lente) as the basal insulin component of an MDI regimen. Both patient groups received premeal insulin lispro (Humalog; Eli Lilly and Co., Indianapolis, IN). This study reports the results of data analysis from a subset of patients who volunteered to use a continuous glucose monitoring system (CGMS) to assess glucose variability. Results from the entire randomized controlled trial are reported elsewhere (15).

## RESEARCH DESIGN AND METHODS

The study design and methods have been described previously (15). Patients with type 1 diabetes ( $n = 175$ ) participated in this randomized study comparing insulin glargine and NPH/Lente insulin, each used with premeal insulin lispro in an MDI regimen. A subset of patients (glargine,  $n = 74$ ; NPH/

From the <sup>1</sup>Department of Pediatrics and Medicine, Pediatric Patient-Oriented Research Unit, Washington University School of Medicine, St. Louis Children's Hospital, St. Louis, Missouri; the <sup>2</sup>Barbara Davis Center, University of Colorado, Aurora, Colorado; the <sup>3</sup>Department of Pediatrics, University of Pittsburgh School of Medicine, Pittsburgh, Pennsylvania; and the <sup>4</sup>Department of Pediatrics, Yale Center for Clinical Investigation, Yale University School of Medicine, New Haven, Connecticut.

Corresponding author: Neil H. White, white\_n@kids.wustl.edu.

Received 25 April 2008 and accepted 10 December 2008.

Published ahead of print at <http://care.diabetesjournals.org> on 23 December 2008. DOI: 10.2337/dc08-0800.

\*A complete list of the members of the 4030 Study Group can be found in the ACKNOWLEDGMENTS.

© 2009 by the American Diabetes Association. Readers may use this article as long as the work is properly cited, the use is educational and not for profit, and the work is not altered. See <http://creativecommons.org/licenses/by-nc-nd/3.0/> for details.

The costs of publication of this article were defrayed in part by the payment of page charges. This article must therefore be hereby marked "advertisement" in accordance with 18 U.S.C. Section 1734 solely to indicate this fact.

Table 1—Adjusted mean change from baseline in time spent above or below specified sensor glucose levels in CGMS subset

|                            | Insulin glargine |                          |                | NPH/Lente |                          |                | Difference       |        |
|----------------------------|------------------|--------------------------|----------------|-----------|--------------------------|----------------|------------------|--------|
|                            | n                | Sample mean<br>(min/day) | P vs. baseline | n         | Sample mean<br>(min/day) | P vs. baseline | Adjusted<br>mean | P      |
|                            |                  |                          |                |           |                          |                |                  |        |
| <70 mg/dl (<3.89 mmol/l)   |                  |                          |                |           |                          |                |                  |        |
| Baseline                   | 45               | 119.0                    |                | 45        | 75.5                     |                |                  |        |
| Week 12                    | 39               | 141.0                    | 0.1067         | 35        | 94.8                     | 0.7013         | 30.4             | 0.4040 |
| Week 24                    | 33               | 64.2                     | 0.0983         | 36        | 85.3                     | 0.5931         | −46.6            | 0.1163 |
| <50 mg/dl (<2.78 mmol/l)   |                  |                          |                |           |                          |                |                  |        |
| Baseline                   | 45               | 25.1                     |                | 45        | 18.2                     |                |                  |        |
| Week 12                    | 39               | 54.0                     | 0.0288         | 35        | 38.6                     | 0.1508         | 10.9             | 0.6315 |
| Week 24                    | 33               | 13.4                     | 0.5246         | 36        | 39.8                     | 0.0083         | −38.2            | 0.0198 |
| ≤40 mg/dl (≤2.22 mmol/l)   |                  |                          |                |           |                          |                |                  |        |
| Baseline                   | 45               | 12.7                     |                | 45        | 6.9                      |                |                  |        |
| Week 12                    | 39               | 27.4                     | 0.0832         | 35        | 21.6                     | 0.2550         | 5.9              | 0.7089 |
| Week 24                    | 33               | 3.0                      | 0.3597         | 36        | 23.8                     | 0.0092         | −26.9            | 0.0130 |
| ≥250 mg/dl (≥13.88 mmol/l) |                  |                          |                |           |                          |                |                  |        |
| Baseline                   | 45               | 397.3                    |                | 45        | 415.4                    |                |                  |        |
| Week 12                    | 39               | 289.9                    | 0.0220         | 35        | 408.3                    | 0.7453         | −93.8            | 0.1756 |
| Week 24                    | 33               | 302.1                    | 0.0347         | 36        | 390.9                    | 0.4545         | −69.2            | 0.3013 |
| ≥350 mg/dl (≥19.43 mmol/l) |                  |                          |                |           |                          |                |                  |        |
| Baseline                   | 45               | 107.0                    |                | 45        | 106.9                    |                |                  |        |
| Week 12                    | 39               | 54.4                     | 0.0126         | 35        | 109.2                    | 0.7910         | −56.7            | 0.1214 |
| Week 24                    | 33               | 66.6                     | 0.0709         | 36        | 87.9                     | 0.2916         | −18.1            | 0.5523 |

Lente,  $n = 75$ ) volunteered to use the CGMS (Medtronic/MiniMed, Northridge, CA), which measures interstitial glucose concentrations every 5 min for 3 days via a glucose oxidase–based method, to compare variability in interstitial glucose levels across the two regimens. CGMS accuracy has been demonstrated to be similar from day to day (16). The median relative absolute difference between sensor and reference plasma glucose values in children with type 1 diabetes has been 11% during outpatient use (17). In this study, patients and the health care team were blinded to CGMS results, which were not used for diabetes management but only for the assessment of glycemic variability.

#### Eligibility criteria and baseline characteristics

Patients aged 9–17 years with type 1 diabetes (for  $\geq 1$  year), at Tanner stage  $\geq 2$  puberty, with A1C level 7.0–9.5%, and at least two insulin injections per day or continuous subcutaneous insulin infusion were enrolled. Excluded were patients with diabetic ketoacidosis in the past 3 months or two or more episodes of severe hypoglycemia (i.e., an event requiring the assistance of another person and accompanied by either a blood glucose level of  $<36$  mg/dl [ $<2.0$  mmol/l] or prompt recovery after oral carbohydrate

intake, intravenous glucose, or glucagon administration) in the past 12 months. Patients had to be willing to perform self-monitoring of blood glucose (SMBG) at least four times daily. The CGMS subgroup had to be willing to use the MiniMed CGMS for up to 3 consecutive days on three occasions.

#### Study medication

Patients were randomized to receive either basal insulin glargine once daily before breakfast or intermediate-acting insulin (NPH or Lente) twice daily; starting doses were 40–50% of the total daily insulin dose. Both groups received insulin lispro before each meal based on carbohydrate intake, with individualized correction doses based on the degree to which blood glucose levels deviated from the target glucose values.

#### Continuous glucose monitoring

Interstitial glucose was measured during three periods (week 0, week 12, and week 24) for 3 consecutive days each. Patients were to enter at least four SMBG values daily to calibrate the CGMS and to record important events (e.g., insulin boluses, snacks, and exercise).

#### Measures of glycemic control and glycemic variability

Glycemic control was assessed by A1C at baseline, 12 weeks, and 24 weeks and by the time CGMS glucose values were  $<70$ ,  $<50$ ,  $\leq 40$ ,  $\geq 250$ , and  $\geq 350$  mg/dl ( $<3.89$ ,  $<2.78$ ,  $\leq 2.22$ ,  $\geq 13.88$ , and  $\geq 19.45$  mmol/l) (refer to Table 1). A1C was measured using ion-exchange high-performance liquid chromatography with the Bio-Rad Variant II Turbo analyzer (Bio-Rad, Hercules, CA). The system was certified by the National Glycohemoglobin Standardization Program with values traceable to the Diabetes Control and Complications Trial reference method; the reported normal range is 4.27–6.07%, with coefficients of variation of 1.94 and 2.58% at A1C values of 6.25 and 12.5%, respectively.

Measures of glucose variability from the CGMS were 1) SD of the mean of the sensor values, 2) mean amplitude of glycemic excursion (MAGE) (18,19), and 3)  $M$  value, which is expressed by the formula below (19).

$$\left( \frac{\sum}{N} \left| 10 \log \frac{\text{Sensor glucose}}{120} \right|^3 + \frac{(\text{Max} - \text{Min Sensor glucose})}{20} \right)$$

Table 2—Demographics, baseline characteristics of randomized patients, and CGMS subpopulation (ref. 24)\*

|                               | Study population |              | CGMS subpopulation |              |
|-------------------------------|------------------|--------------|--------------------|--------------|
|                               | Insulin glargine | NPH/Lente    | Insulin glargine   | NPH/Lente    |
| <i>n</i>                      | 85               | 90           | 45                 | 45           |
| Age (years)                   | 13.1 ± 2.4       | 13.4 ± 2.4   | 13.2 ± 2.3         | 13.4 ± 2.5   |
| Sex (female)                  | 45 (53.6)        | 44 (52.4)    | 23 (51.1)          | 19 (42.2)    |
| Race/ethnicity                |                  |              |                    |              |
| Caucasian                     | 71 (84.5)        | 68 (81.0)    | 41 (91.1)          | 40 (88.9)    |
| African American              | 0 (0.0)          | 7 (8.3)      | 0 (0.0)            | 0 (0.0)      |
| Asian                         | 2 (2.4)          | 2 (2.4)      | 0 (0.0)            | 2 (4.4)      |
| Hispanic                      | 7 (8.3)          | 2 (4.8)      | 3 (6.7)            | 2 (4.4)      |
| Multiracial/multiethnic       | 2 (2.4)          | 1 (1.2)      | 1 (2.2)            | 0 (0.0)      |
| Other                         | 2 (2.4)          | 2 (2.4)      | 0 (0.0)            | 1 (2.2)      |
| Weight (kg)                   | 57.2 ± 14.8      | 59.1 ± 18.1  | 57.9 ± 15.1        | 57.8 ± 19.4  |
| BMI (kg/m <sup>2</sup> )      | 22.6 ± 3.8       | 22.9 ± 5.0   | 22.6 ± 0.8         | 22.6 ± 0.9   |
| Age at onset (years)          | 8.5 ± 3.5        | 8.5 ± 3.7    | 8.3 ± 3.7          | 9.0 ± 3.5    |
| Duration of diabetes (years)  | 5.1 ± 3.4        | 5.4 ± 3.7    | 5.4 ± 3.7          | 4.9 ± 3.6    |
| A1C (%)                       |                  |              |                    |              |
| Baseline                      | 7.8 ± 0.8        | 8.0 ± 0.8    | 7.9 ± 0.9          | 8.0 ± 0.8    |
| Adjusted baseline             |                  |              |                    |              |
| A1C 10th percentile           | 7.28             | 7.12         | 7.28               | 6.95         |
| A1C median percentile         | 7.74             | 7.86         | 7.82               | 7.84         |
| A1C 90th percentile           | 8.32             | 8.79         | 8.51               | 8.97         |
| Baseline fasting SMBG (mg/dl) | 188.5 ± 54.4     | 203.0 ± 52.1 | 187.4 ± 62.5       | 203.4 ± 42.3 |

Data are means, means ± SD, or *n* (%). Adjusted mean values of A1C are at study end in relation to baseline values. \*No significant differences between groups who did or did not participate in CGMS.

Minutes spent at glucose levels <70, <50, ≤40, ≥250, and ≥350 mg/dl (<3.89, <2.78, ≤2.22, ≥13.88, and ≥19.45 mmol/l) were calculated.

For CGMS data to be analyzable, each patient had to have a sufficient duration (i.e., 24 h of sensor data for each day) of CGMS data and a date for CGMS data collection at the appropriate time in the study. Some patients in the insulin glargine (*n* = 29) and the NPH/Lente (*n* = 30) groups were excluded from the analysis because of discrepancies between CGMS and SMBG values recorded by the same patient, unfamiliarity with the mechanics of the CGMS, or technical problems during CGMS measurement. Forty-five patients in each group had analyzable data at baseline and at any end point, and 33 patients in the glargine group and 36 in the NPH/Lente group had data at baseline and week 24.

**RESULTS**— Study results from the overall trial are reported elsewhere (15). In summary, change in A1C level from baseline to 24 weeks was  $-0.25 \pm 0.14\%$  for the glargine group (*n* = 76) and  $-0.05 \pm 0.13\%$  for the NPH/Lente group (*n* = 81); these changes were not signifi-

cant (*P* = 0.1725). However, repeated-measures analysis showed a greater reduction in A1C level associated with the use of insulin glargine in patients who had higher baseline A1C values (for median and 90th percentile values; *P* < 0.05 between groups). Rates of glucose readings <70 mg/dl (3.88 mmol/l) (per patient-year) were 116.1 and 93.8 in the glargine and the NPH/Lente group, respectively (*P* = 0.030), whereas rates of glucose <50 mg/dl (2.78 mmol/l) (21 in glargine group vs. 20 in NPH/Lente group; *P* = 0.81) and <36 mg/dl (2.0 mmol/l) (1.2 vs. 1.7; *P* = 0.32), severe hypoglycemia (0.20 vs. 0.09; *P* = 0.18), and treatment-emergent adverse events (17.6 vs. 8.9%; *P* = 0.12) did not differ significantly between groups.

#### Patient characteristics at baseline

There were no significant differences in baseline characteristics between patients who used the CGMS and the entire study population (Table 2). There also was no significant difference between the main study group and CGMS subgroup with respect to changes in A1C level during the trial (Table 1).

#### Glycemic outcomes

In the CGMS subgroup, the adjusted mean change in A1C level from baseline to end point was  $-0.12\%$  and  $-0.10\%$  for glargine versus NPH/Lente, respectively (*P* = 0.9250). A1C outcomes and hypoglycemia rates (events per patient-year, determined by glucose meter measurements) in the CGMS subgroup paralleled those in the overall study (15).

#### Continuous glucose monitoring values and variability

**Mean glucose value.** There were no between-group differences in mean 24-h glucose concentrations (Table 3; Fig. 1) or the glucose concentrations analyzed in 6-h intervals throughout the day (data not shown).

**SD of glucose.** Subjects using insulin glargine showed a significant reduction in glucose variability (as measured by SD) from baseline (*P* < 0.0001 for each time point) and a significantly greater reduction at week 24 than those using NPH/Lente (*P* = 0.0147) (Table 3; Fig. 2A). Those using NPH/Lente had a trend for reduction in SD from baseline at week 12 (*P* = 0.0503) but not at week 24 (*P* = 0.4286) (Table 2; Fig. 2A).

Table 3—Mean CGMS sensor values and variability measures at baseline and weeks 12 and 24

|                         | Insulin glargine |                     |                | NPH/Lente |                     |                | P for difference* |
|-------------------------|------------------|---------------------|----------------|-----------|---------------------|----------------|-------------------|
|                         | n                | Sample mean (mg/dl) | P vs. baseline | n         | Sample mean (mg/dl) | P vs. baseline |                   |
| Mean CGMS sensor values |                  |                     |                |           |                     |                |                   |
| Baseline                | 45               | 190.6               |                | 45        | 197.1               |                |                   |
| Week 12                 | 39               | 177.3               | 0.0728         | 35        | 195.4               | 0.6759         | 0.3516            |
| Week 24                 | 33               | 181.8               | 0.2228         | 36        | 195.3               | 0.6371         | 0.5745            |
| SD                      |                  |                     |                |           |                     |                |                   |
| Baseline                | 45               | 77.4                |                | 45        | 73.9                |                |                   |
| Week 12                 | 39               | 63.8                | <0.0001        | 35        | 71.2                | 0.0503         | <0.0509           |
| Week 24                 | 33               | 64.2                | <0.0001        | 36        | 74.3                | 0.4286         | 0.0147            |
| MAGE                    |                  |                     |                |           |                     |                |                   |
| Baseline                | 45               | 188.5               |                | 45        | 177.7               |                |                   |
| Week 12                 | 39               | 154.7               | 0.0001         | 35        | 173.6               | 0.1139         | 0.1051            |
| Week 24                 | 33               | 152.0               | <0.0001        | 36        | 182.0               | 0.7459         | 0.0055            |
| M value                 |                  |                     |                |           |                     |                |                   |
| Baseline                | 45               | 43.5                |                | 45        | 43.2                |                |                   |
| Week 12                 | 39               | 36.8                | 0.0309         | 35        | 43.7                | 0.8440         | 0.1768            |
| Week 24                 | 33               | 34.2                | 0.0048         | 36        | 42.3                | 0.7360         | 0.0631            |

\*Difference in adjusted mean change between groups.

**MAGE.** MAGE was significantly reduced in the insulin glargine group at weeks 12 ( $P = 0.0001$ ) and 24 ( $P < 0.0001$ ) compared with baseline (Table 2). The adjusted mean change from baseline in MAGE for NPH/Lente-treated patients was not significant at week 12 ( $P = 0.1139$ ) or 24 ( $P = 0.7459$ ). The between-group difference in adjusted mean change in MAGE from baseline favored glargine at week 12 and was significant at week 24 ( $P = 0.0055$ ) (Fig. 2B).

**M value.** Although between-group differences in the adjusted mean reduction in M value were not statistically significant (Fig. 2C), insulin glargine-treated patients experienced significant reductions from baseline at weeks 12 ( $P = 0.0309$ ) and 24 ( $P = 0.0048$ ) (Table 3). The adjusted mean change from baseline in the NPH/Lente group was not significant ( $P = 0.8440$  and  $P = 0.7360$  at 12 and 24 weeks, respectively).

### Hypoglycemia and hyperglycemia as determined by CGMS

Compared with NPH/Lente, insulin glargine therapy reduced the time spent at glucose levels  $<70$ ,  $<50$ , and  $\leq 40$  mg/dl ( $<3.89$ ,  $<2.78$ , and  $\leq 2.22$  mmol/l) between baseline and week 24 (Table 1). Differences in adjusted mean change from baseline were statistically significant for insulin glargine for glucose levels  $<50$  mg/dl ( $<2.78$  mmol/l;  $P = 0.0198$ ) and  $\leq 40$  mg/dl ( $\leq 2.22$  mmol/l;  $P = 0.0130$ ). Insulin glargine also significantly reduced

the time spent at glucose levels  $\geq 250$  and  $\geq 350$  mg/dl ( $\geq 13.88$  and  $\geq 19.43$  mmol/l) between baseline and week 12 ( $P = 0.0220$  and  $P = 0.0126$ , respectively); at week 24, time spent  $\geq 250$  mg/dl ( $\geq 13.88$  mmol/l) was also significantly reduced ( $P = 0.0347$ ), but the time spent  $\geq 350$  mg/dl ( $\geq 19.43$  mmol/l;  $P = 0.0709$ ) was not. For NPH/Lente, time spent  $\geq 350$  mg/dl ( $\geq 19.43$  mmol/l) or  $\geq 250$  mg/dl ( $\geq 13.88$  mmol/l) was not reduced at 12 or 24 weeks, and there were no between-group differences ( $P = 0.1214$ – $0.5523$  for all).

**CONCLUSIONS**— The most important finding of this substudy was that pediatric patients receiving insulin glargine appeared to experience less variability in glucose levels, as assessed by SD and MAGE, than patients receiving NPH/Lente insulin. Reductions in glycemic variability may have important clinical implications, including tighter glycemic control with less risk of hypoglycemia and a reduction in vascular complications (3,19). Cox et al. (20) found that high glucose variability precedes severe hypoglycemia, suggesting that reducing glucose fluctuations may reduce the risk for severe hypoglycemia. Hypoglycemia limits the ability to control blood glucose and A1C levels in insulin-treated diabetes (21). Increased glycemic variability, independently of average blood glucose and A1C levels, is believed by some to contribute to vascular complications (22,23).

Thus, information on variability of blood glucose may become increasingly important to clinicians and patients in the future; CGMS may serve as a valuable tool for assessing the overall level of glycemic control beyond what can be determined by measuring A1C levels alone. The CGMS with masked 5-min sampling used in this study provides a better estimate of the magnitude of glucose excursions than the fixed-point-in-time 8-point testing procedures used in other studies (3).

In the CGMS subpopulation in this study, despite similar reductions in A1C ( $-0.12$  vs.  $-0.10\%$ ), the adjusted mean difference from baseline at 24 weeks in time spent at glucose levels of  $\leq 40$  and  $<50$  mg/dl ( $\leq 2.22$  and  $<2.78$  mmol/l) by patients using insulin glargine was significantly less than time spent by those using NPH/Lente (13.4 vs. 39.8 min/day,  $P = 0.0198$  for glucose  $<50$  mg/dl [ $<2.78$  mmol/l]; and 3.0 vs. 23.8 min/day,  $P = 0.013$  for glucose  $\leq 40$  mg/dl [ $\leq 2.22$  mmol/l]). The time spent  $<70$  mg/dl was similar between groups (64.2 vs. 85.3 min/day;  $P = 0.1163$ ) (Table 1). In both groups there was an initial trend for an increase in time at each hypoglycemia threshold at week 12, followed by a reduction by week 24, as noted above. This increase may reflect the initial up-titration of insulin doses at the start of the study, followed by stabilization of doses. There were too few severe hypoglycemic events to allow identification of differ-



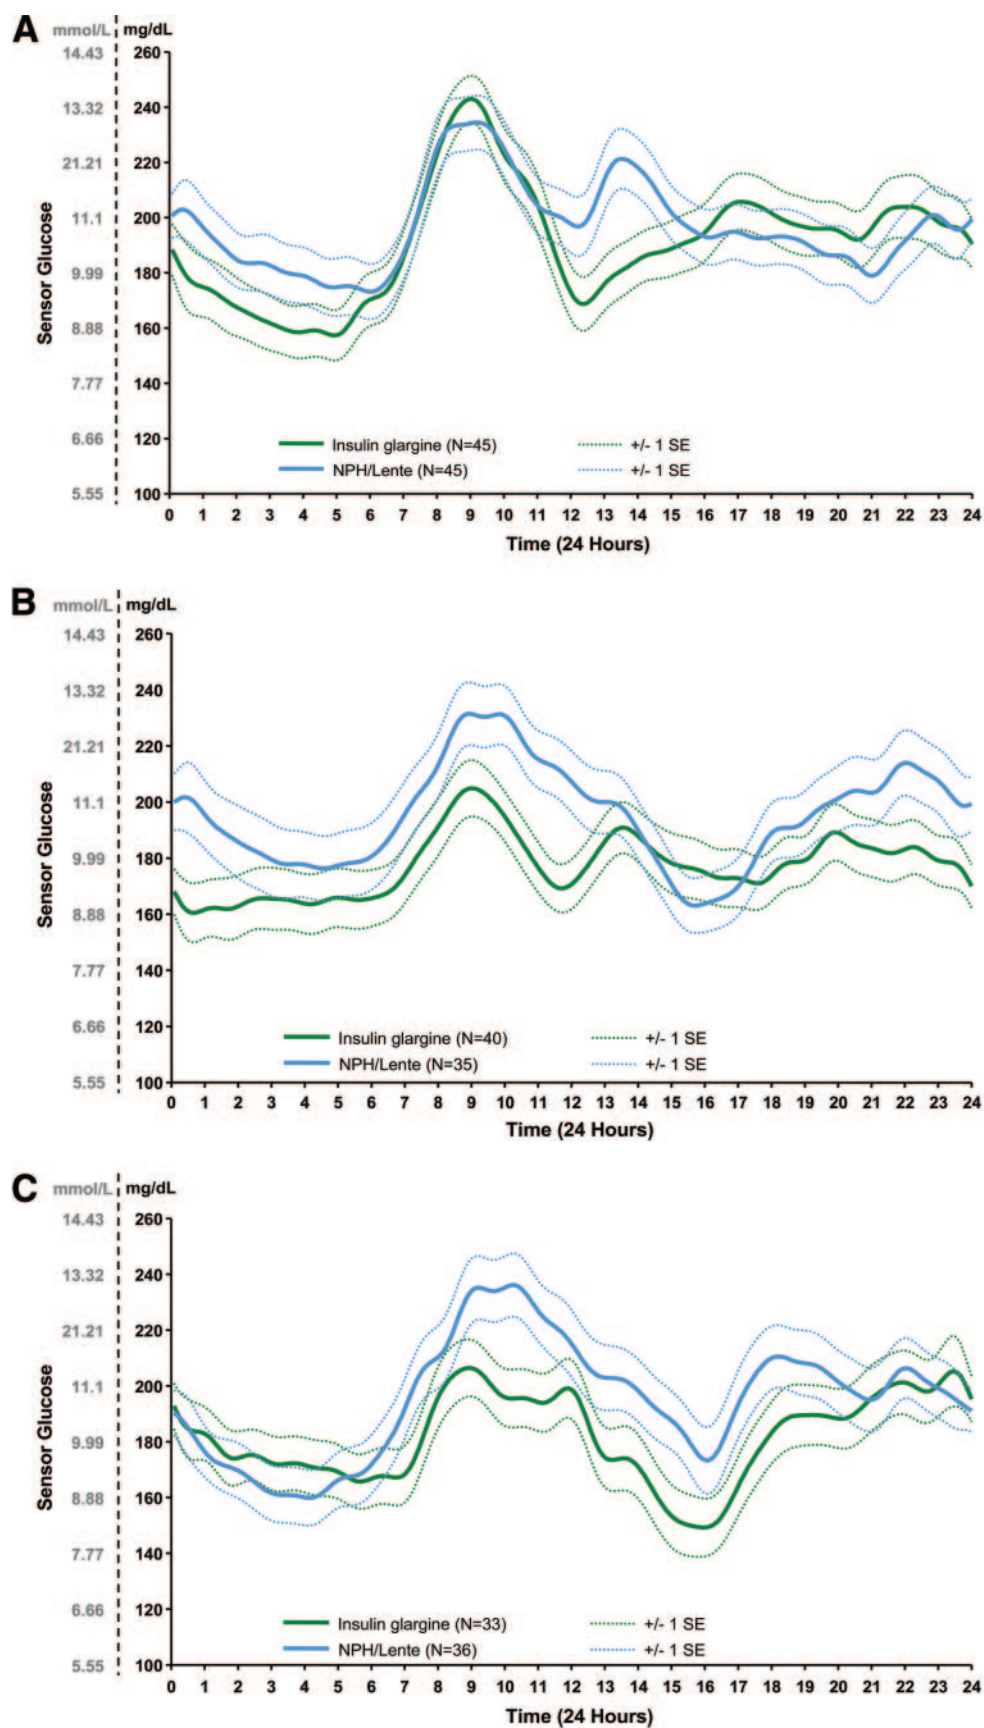

**Figure 1**—Mean ( $\pm 1$  SE) CGMS curves in patients with at least one 24-h CGMS recording at the following time points: baseline (A), week 12 (B), and week 24 (C) for those in the glargine group (green) and the NPH/Lente group (blue).

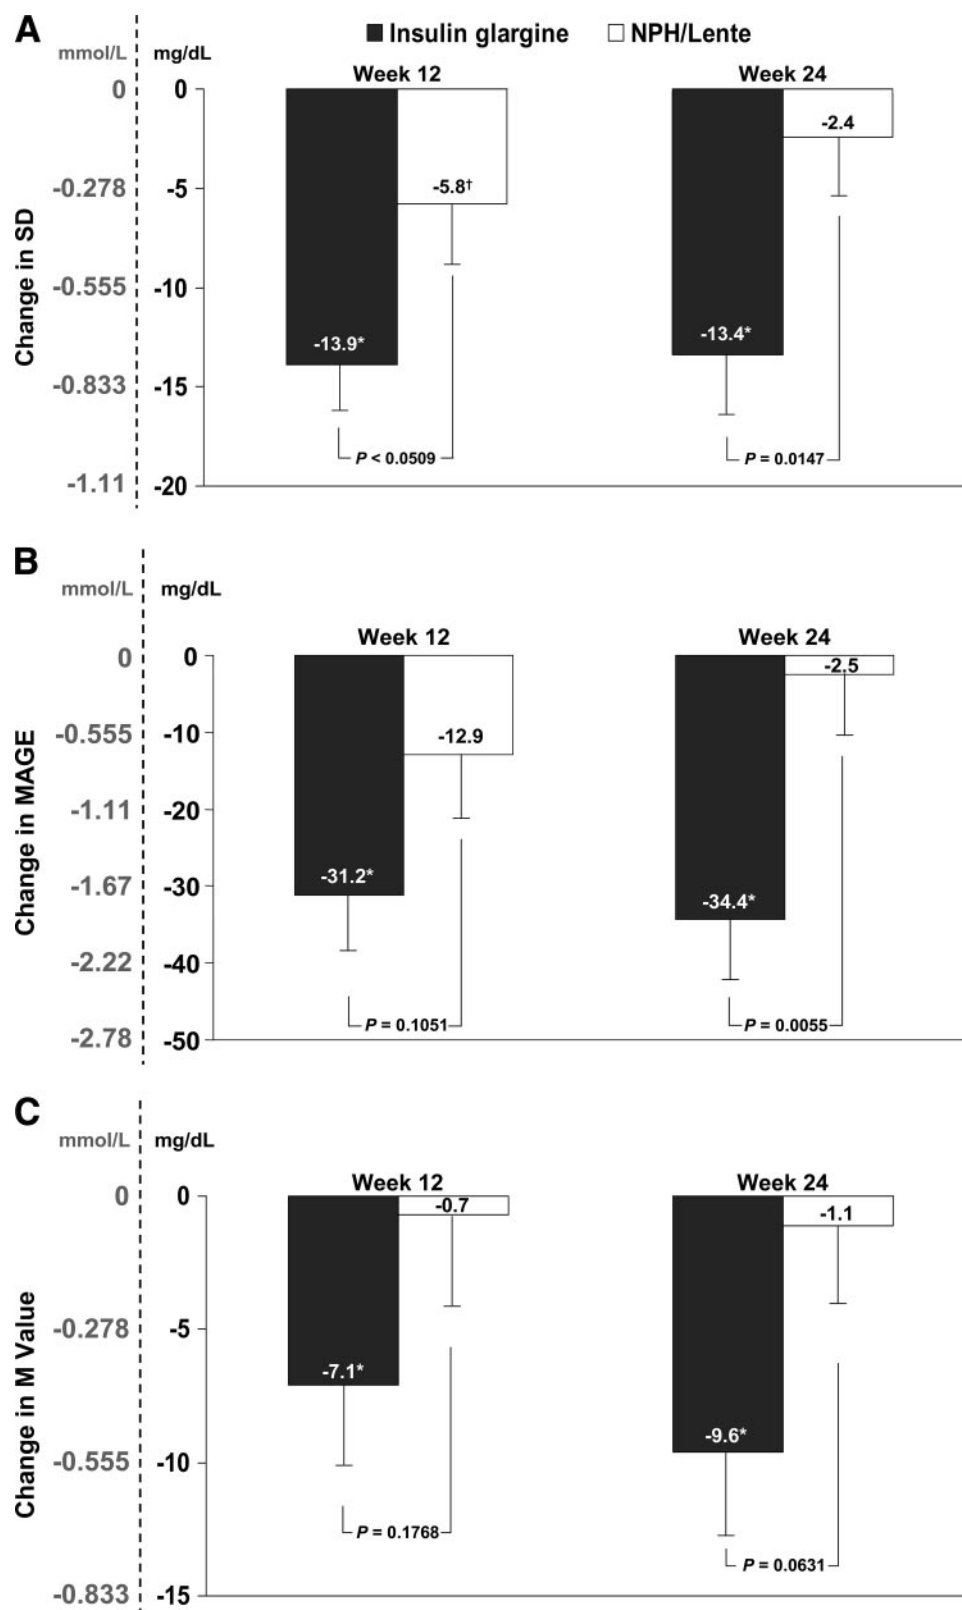

**Figure 2**—Adjusted mean change from baseline in measures of glucose variability associated with insulin glargine and intermediate-acting insulin (NPH/Lente). A: SD; \* $P \leq 0.05$  from baseline; † $P = 0.0503$  from baseline. B: MAGE; \* $P \leq 0.0001$  from baseline. C: M value; \* $P \leq 0.04$  from baseline.

ences between groups. No other clinical correlates were evaluated.

Although the CGMS subgroup in the

current study was similar to the overall study population in terms of demographics, one limitation of this analysis is the

possibility that the CGMS subgroup may have been different from the overall population, based on unmeasured variables,

such as motivation, conscientiousness, and other behavioral differences that can affect disease management. Whereas all patients had to have at least Tanner stage 2 pubertal development to enter the study, the impact of different stages of pubertal development on glycemic control and glucose variability could not be determined from the data collected.

In conclusion, the results of this study suggest that the use of insulin glargine as the basal component of a multiple injection regimen appears to be associated with a reduction in glycemic variability. In addition, to the extent to which reduced glycemic variability may contribute to a decrease in diabetes-related complications, the use of insulin glargine may be beneficial.

**Acknowledgments**—W.V.T. is a diabetes advisory board consultant for Eli Lilly, Medtronic Diabetes, Novo Nordisk, and sanofi-aventis and is on the speakers bureau for Eli Lilly, Medtronic Diabetes, and Novo Nordisk. Editorial support for this study was provided by sanofi-aventis U.S. Group. No other potential conflicts of interest relevant to this article were reported.

Parts of this study were presented in abstract form at the 66th Scientific Sessions of the American Diabetes Association, Washington, DC, 9–13 June 2006. These data have also been reported previously in abstract form [*Diabetologia* 49 (Suppl. 1):559–560, 2006, Abstract 0919].

### Investigators in the 4030 Study Group

J. Aisenberg, H. Allen, J. Amrhein, B. Boston, M.I. Brakin, N. Cakan, L.C. Deeb, D.A. Elder, D.E. Estrada, R.A. Guthrie, D.E. Hale, J. Hassing, R.P. Hoffman, R. Johnsonbaugh, K. Kaiserman, A.B. King, L.M.B. Laffel, J.I. Malone, R.P. Mathew, S.M. Rosenthal, P. Saenger, D.A. Schatz, M.L. Spencer, S.M. Willi, and W.B. Zipf.

### References

1. The Diabetes Control and Complications Trial Research Group: The effect of intensive treatment of diabetes on the development and progression of long-term complications in insulin-dependent diabetes mellitus. *N Engl J Med* 329:977–986, 1993
2. Diabetes Control and Complications Trial Research Group: Effect of intensive diabetes treatment on the development and progression of long-term complications in adolescents with insulin-dependent diabetes mellitus: Diabetes Control and Complications Trial. *J Pediatr* 125:177–188, 1994
3. Fiallo-Scharer R: Eight-point glucose testing versus the continuous glucose monitoring system in evaluation of glycemic control in type 1 diabetes. *J Clin Endocrinol Metab* 90:3387–3391, 2005
4. Monnier L, Mas E, Ginet C, Michel F, Villon L, Cristol JP, Colette C: Activation of oxidative stress by acute glucose fluctuations compared with sustained chronic hyperglycemia in patients with type 2 diabetes. *JAMA* 295:1681–1687, 2006
5. Temelkova-Kurktschiev TS, Koehler C, Henkel E, Leonhardt W, Fuecker K, Hanefeld M: Postchallenge plasma glucose and glycemic spikes are more strongly associated with atherosclerosis than fasting glucose or HbA1c level. *Diabetes Care* 23:1830–1834, 2000
6. Esposito K, Giugliano D, Nappo F, Marfella R: Regression of carotid atherosclerosis by control of postprandial hyperglycemia in type 2 diabetes mellitus. *Circulation* 110:214–219, 2004
7. Ceriello A, Cavarape A, Martinelli L, Da Ros R, Marra G, Quagliaro L, Piconi L, Assaloni R, Motz E: The post-prandial state in type 2 diabetes and endothelial dysfunction: effects of insulin aspart. *Diabet Med* 21:171–175, 2004
8. Brownlee M: The pathobiology of diabetic complications: a unifying mechanism. *Diabetes* 54:1615–1625, 2005
9. Hirsch IB, Parkin CG: Is A1C the best measure of glycemic control? *US Endocrine Review* 9:22–24, 2005
10. Brownlee M, Hirsch IB: Glycemic variability: a hemoglobin A1c-independent risk factor for diabetic complications. *JAMA* 295:1707–1708, 2006
11. Lepore M, Pampanelli S, Fanelli C, Porcellati F, Bartocci L, Di Vincenzo A, Cordoni C, Costa E, Brunetti P, Bolli GB: Pharmacokinetics and pharmacodynamics of subcutaneous injection of long-acting human insulin analog glargine, NPH insulin, and ultralente human insulin and continuous subcutaneous infusion of insulin lispro. *Diabetes* 49:2142–2148, 2000
12. Hershen KS, Blevins TC, Mayo CA, Roskamp R: Once-daily insulin glargine compared with twice-daily NPH insulin in patients with type 1 diabetes. *Endocr Pract* 10:10–17, 2004
13. Fonseca V, Bell DS, Berger S, Thomson S, Mecca TE: A comparison of bedtime insulin glargine with bedtime neutral protamine hagedorn insulin in patients with type 2 diabetes: subgroup analysis of patients taking once-daily insulin in a multicenter, randomized, parallel group study. *Am J Med Sci* 328:274–280, 2004
14. Schober E, Schoenle E, Van Dyk J, Wernicke-Panten K: Comparative trial between insulin glargine and NPH insulin in children and adolescents with type 1 diabetes mellitus. *J Pediatr Endocrinol Metab* 15:369–376, 2002
15. Chase HP, Arslanian S, White NH, Tamborlane WV: Insulin glargine versus intermediate-acting insulin as the basal component of multiple daily injection regimens for adolescents with type 1 diabetes mellitus. *J Pediatr* 153:547–553, 2008
16. Diabetes Research in Children Network (DIRECNET) Study Group: The accuracy of the CGMS in children with type 1 diabetes: results of the diabetes research in children network (DirecNet) accuracy study. *Diabetes Technol Ther* 5:781–789, 2003
17. Tansey MJ, Beck RW, Buckingham BA, Mauras N, Fiallo-Scharer R, Xing D, Killman C, Tamborlane WV, Ruedy KJ, the Diabetes Research in Children Network (DirecNet) Study Group: Accuracy of the modified continuous glucose monitoring system (CGMS) sensor in an outpatient setting: results from a diabetes research in children network (DirecNet) study. *Diabetes Technol Ther* 7:109–114, 2005
18. Service FJ, Molnar GD, Rosevear JW, Ackerman E, Gatewood LC, Taylor WF: Mean amplitude of glycemic excursions, a measure of diabetic instability. *Diabetes* 19:644–655, 1970
19. Service FJ, O'Brien PC, Rizza RA: Measurements of glucose control. *Diabetes Care* 10:225–237, 1987
20. Cox DJ, Gonder-Frederick L, Ritterband L, Clarke W, Kovatchev BP: Prediction of severe hypoglycemia. *Diabetes Care* 30:1370–1373, 2007
21. Cryer PE: Hypoglycemia risk reduction in type 1 diabetes. *Exp Clin Endocrinol Diabetes* 109 (Suppl. 2):S412–S423, 2001
22. Feringa HH, Karagiannis SE, Vidakovic R, Elhendy A, Schouten O, Boersma E, Bax JJ, Poldermans D: Glycemic control, lipid-lowering treatment, and prognosis in diabetic patients with peripheral atherosclerotic disease. *Ann Vasc Surg* 21:780–789, 2007
23. Hirsch IB, Brownlee M: Should minimal blood glucose variability become the gold standard of glycemic control? *J Diabetes Complications* 19:178–181, 2005
24. White NH, Tamborlane WV, Usiskin K: Less variability in blood glucose values with insulin glargine versus intermediate-acting insulin (NPH/LENTE) in adolescents with type 1 diabetes. *Diabetes* 55 (Suppl. 1):A138, 2006
